# Supplementary material for: Combined Dusp4 and p53 loss with Dbf4 amplification drives tumorigenesis via cell cycle restriction and replication stress escape in breast cancer
Source: PubMed Central journal article supplement (PMC9290202; doi:10.1186/s13058-022-01542-y), 2022-07-18

# Supplementary Figure 1

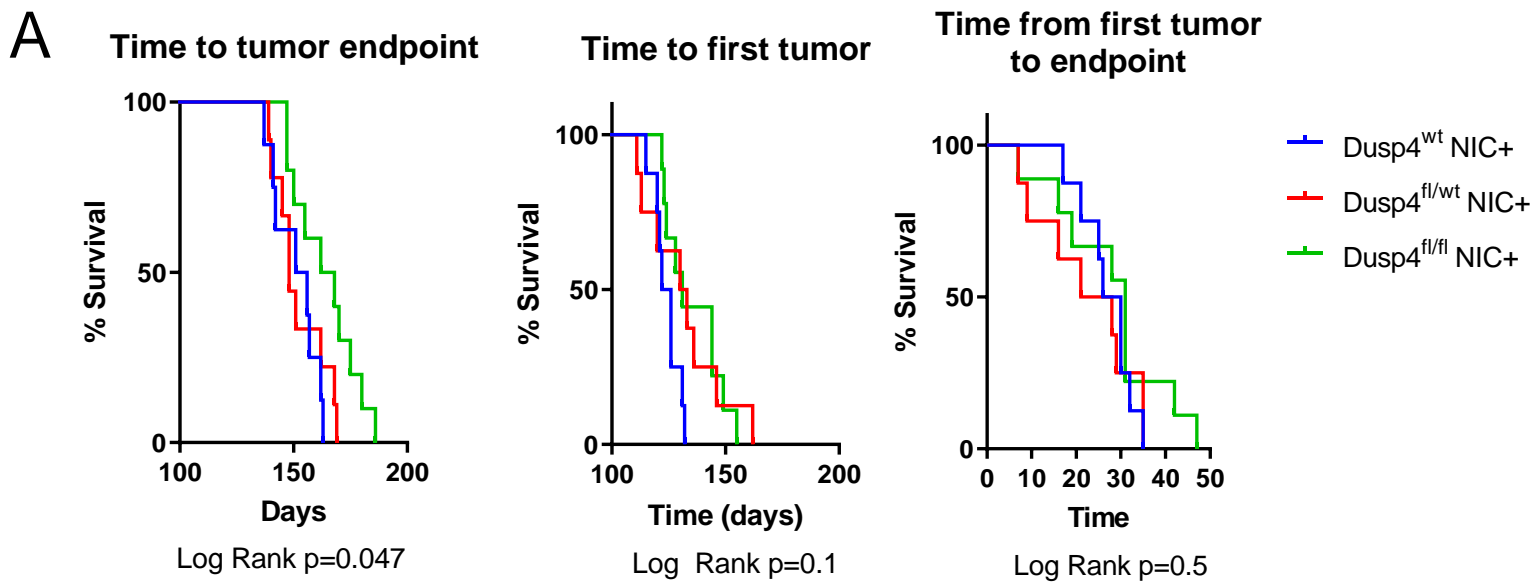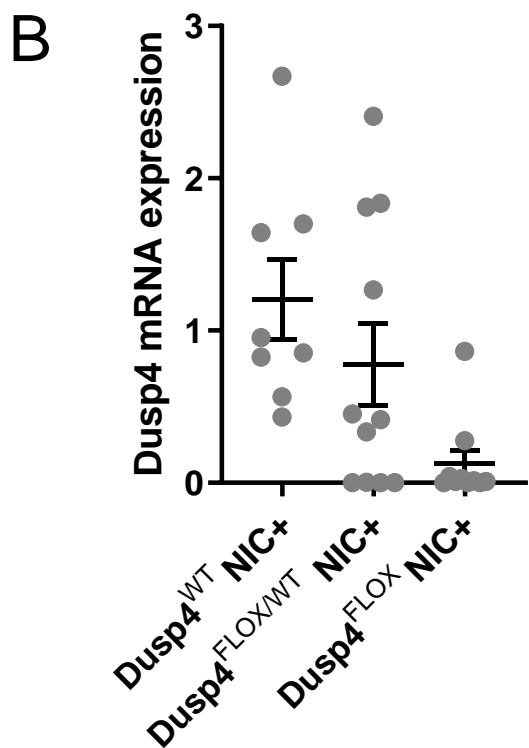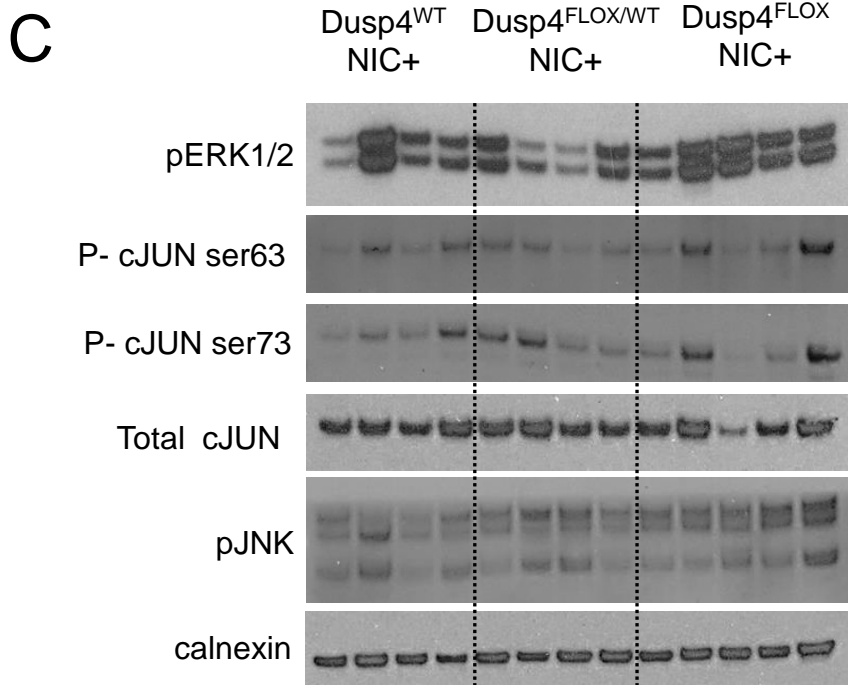

# Supplementary Figure 2

A

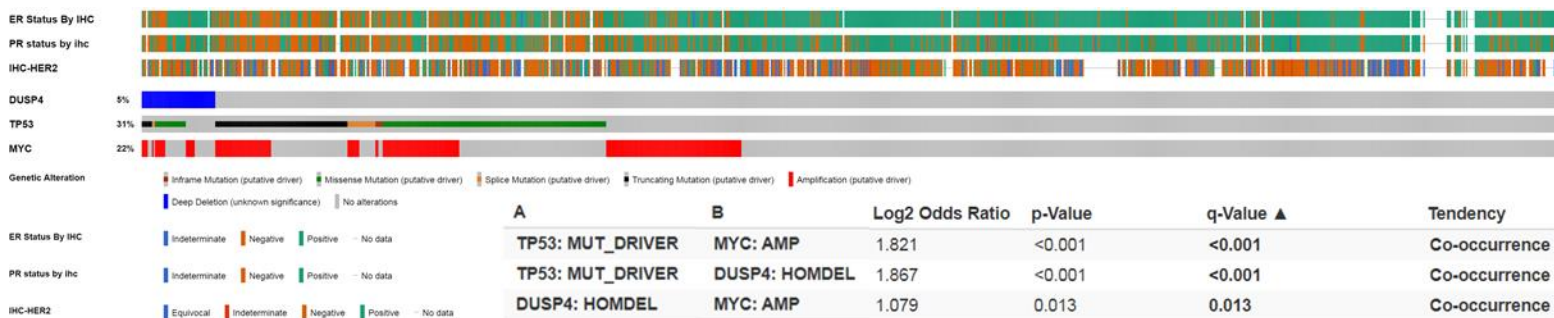

B

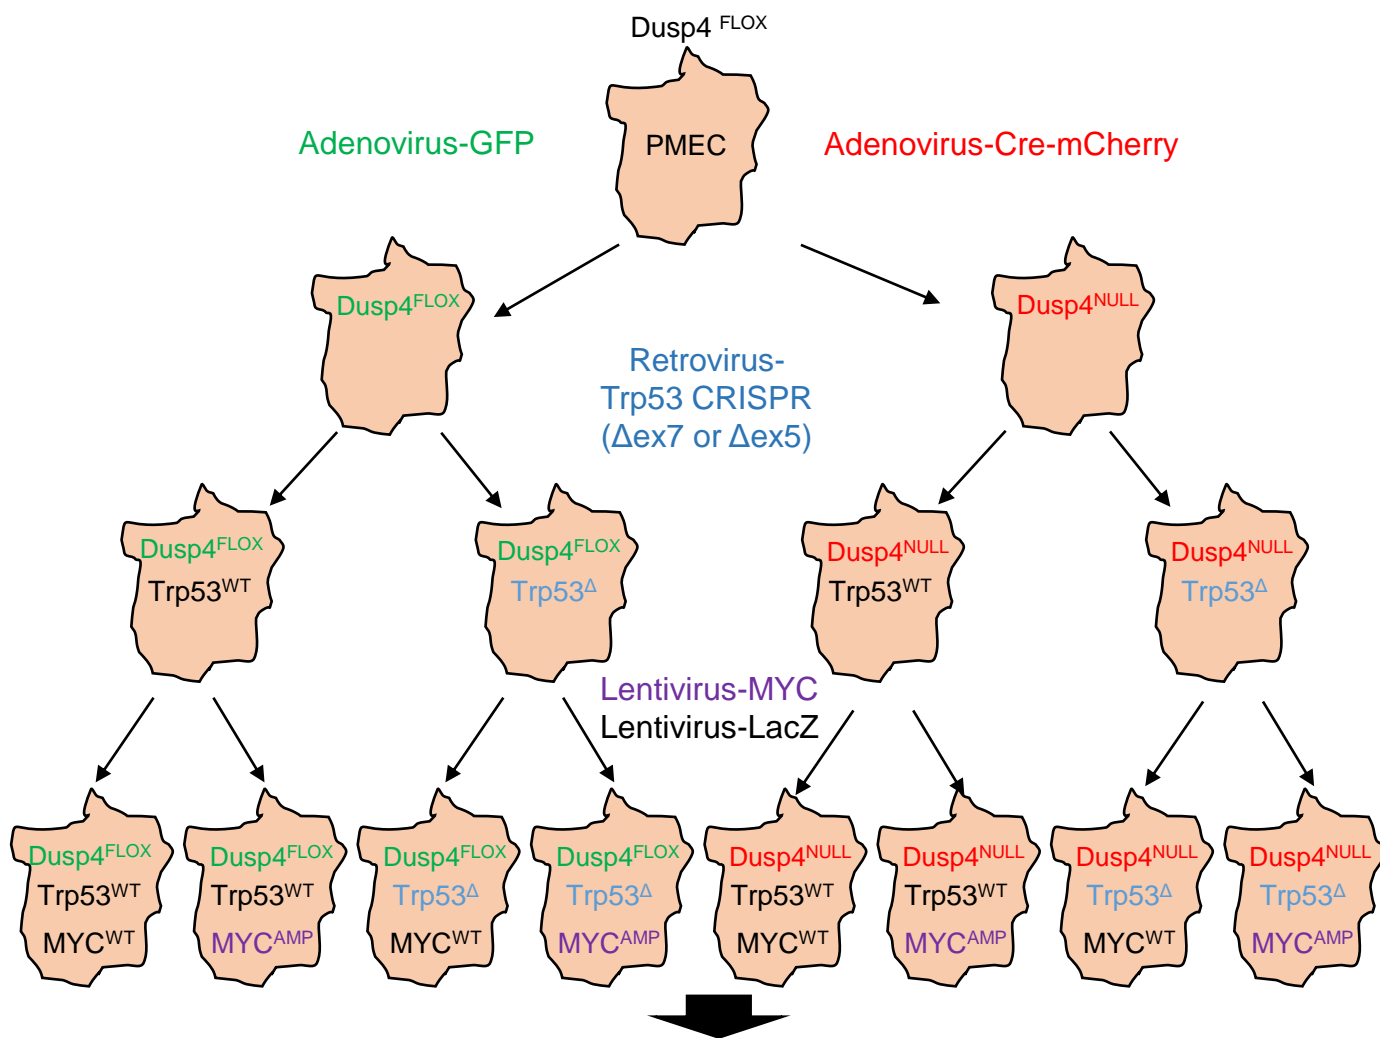

NGS and tumor implantation studies within 10 passages of cell line generation

# Supplementary Figure 3

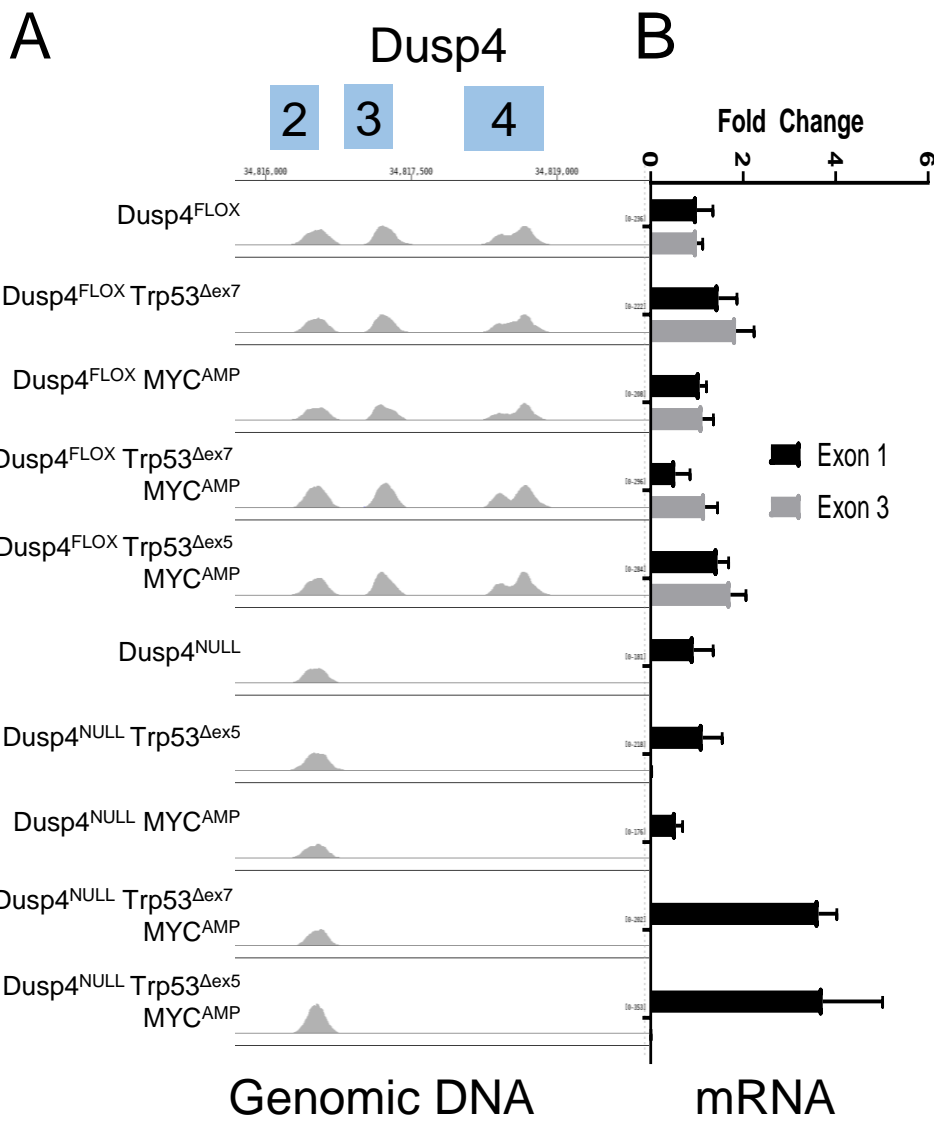

**C**

|                                                                  |                                                                                                                                                    |
|------------------------------------------------------------------|----------------------------------------------------------------------------------------------------------------------------------------------------|
| <b>Dusp4<sup>FLOX</sup></b>                                      | No alterations detected                                                                                                                            |
| <b>Dusp4<sup>FLOX</sup> p53<sup>Δex7</sup></b>                   | Heterozygous (53%) stop gain (C239X) in exon 7                                                                                                     |
| <b>Dusp4<sup>FLOX</sup> MYC<sup>amp</sup></b>                    | No alterations detected                                                                                                                            |
| <b>Dusp4<sup>FLOX</sup> p53<sup>Δex7</sup> MYC<sup>amp</sup></b> | Homozygous (100%) frameshift insertion (C239fs) in exon 7                                                                                          |
| <b>Dusp4<sup>FLOX</sup> p53<sup>Δex5</sup> MYC<sup>amp</sup></b> | Hemizygous (23%) frameshift deletion (K162fs) in exon 5; Near-homozygous (93%) downstream non-frameshift deletion (166_167del) in exon 5           |
| <b>Dusp4<sup>NULL</sup></b>                                      | No alterations detected                                                                                                                            |
| <b>Dusp4<sup>NULL</sup> p53<sup>Δex5</sup></b>                   | Homozygous (100%) nonframeshift deletion (166_166del) in exon 5                                                                                    |
| <b>Dusp4<sup>NULL</sup> MYC<sup>amp</sup></b>                    | No alterations detected                                                                                                                            |
| <b>Dusp4<sup>NULL</sup> p53<sup>Δex7</sup> MYC<sup>amp</sup></b> | Heterozygous (45%) non-frameshift deletion (233_244del) in exon 7; Near-homozygous (83%) downstream non-frameshift deletion (237_245del) in exon 7 |
| <b>Dusp4<sup>NULL</sup> p53<sup>Δex5</sup> MYC<sup>amp</sup></b> | Heterozygous (45%) frameshift deletion (K162fs) in exon 5; homozygous (100%) downstream non-frameshift deletion (166_167del) in exon 5             |

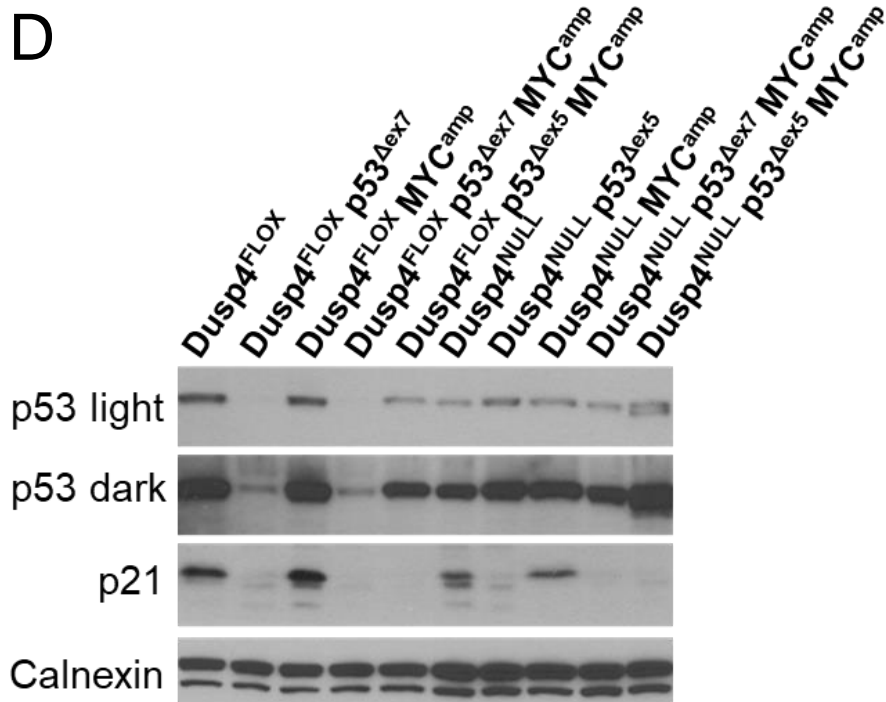

# Supplementary Figure 4

A

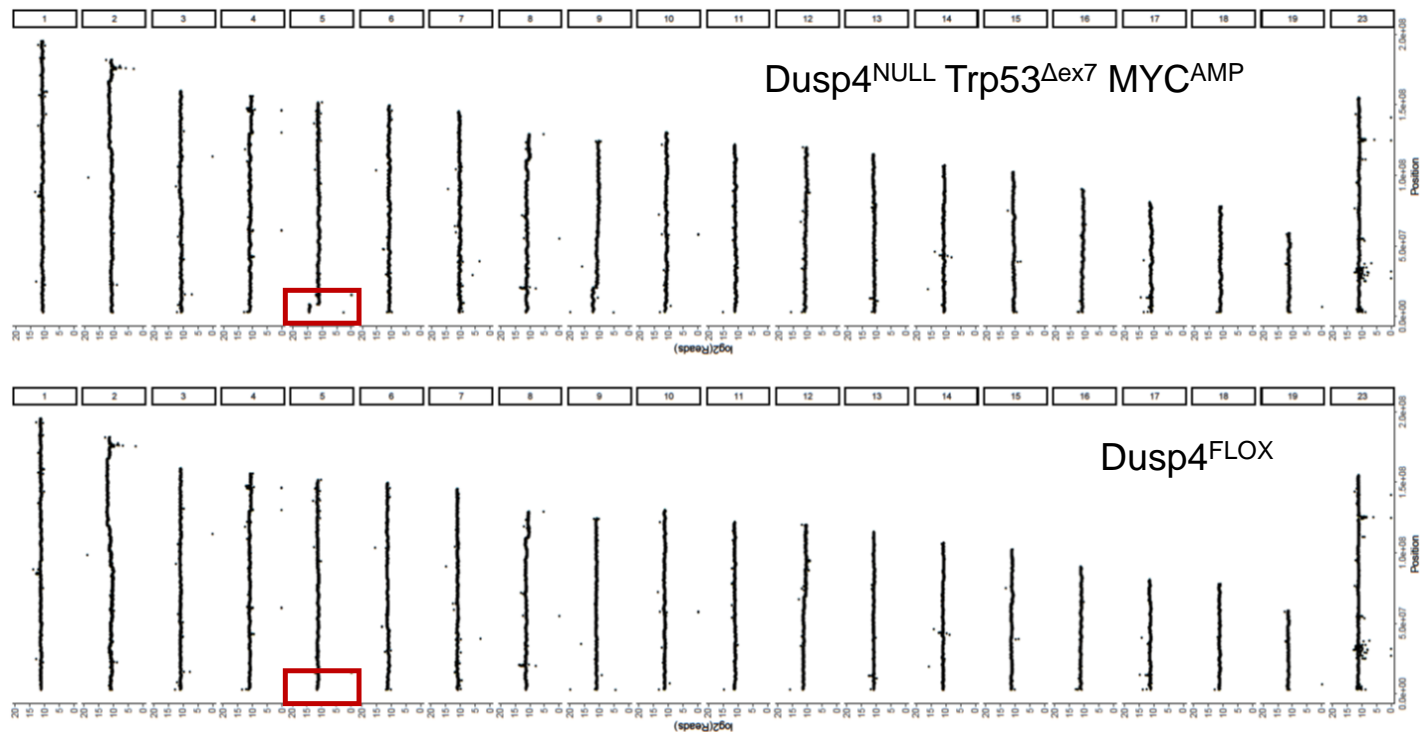

# Supplementary Figure 5

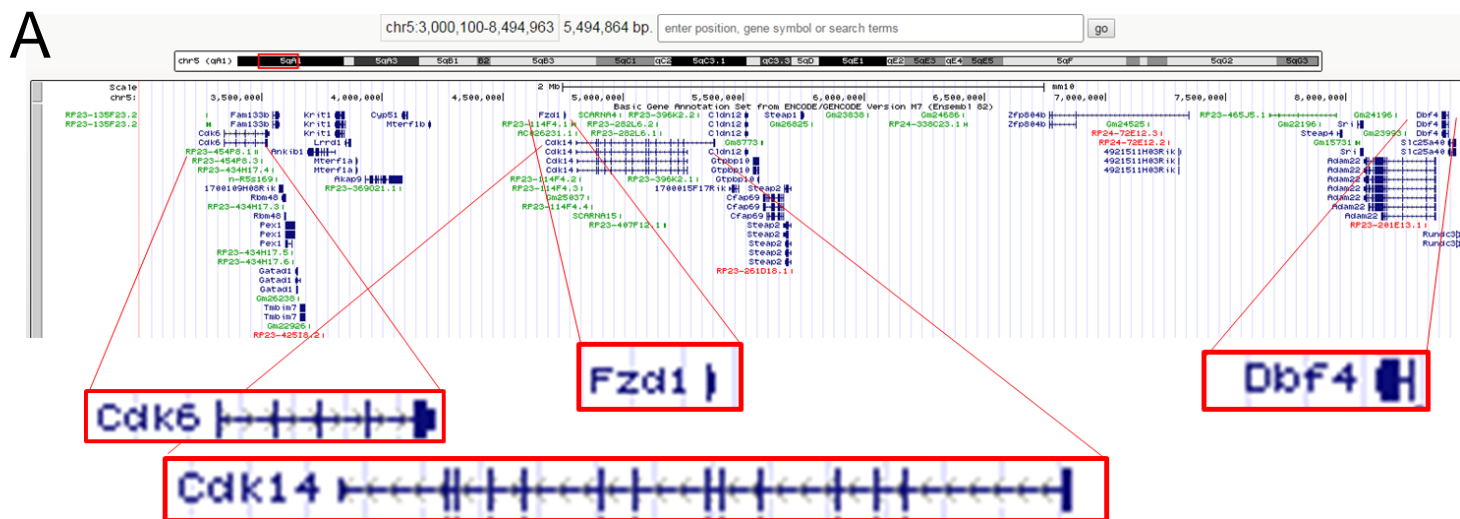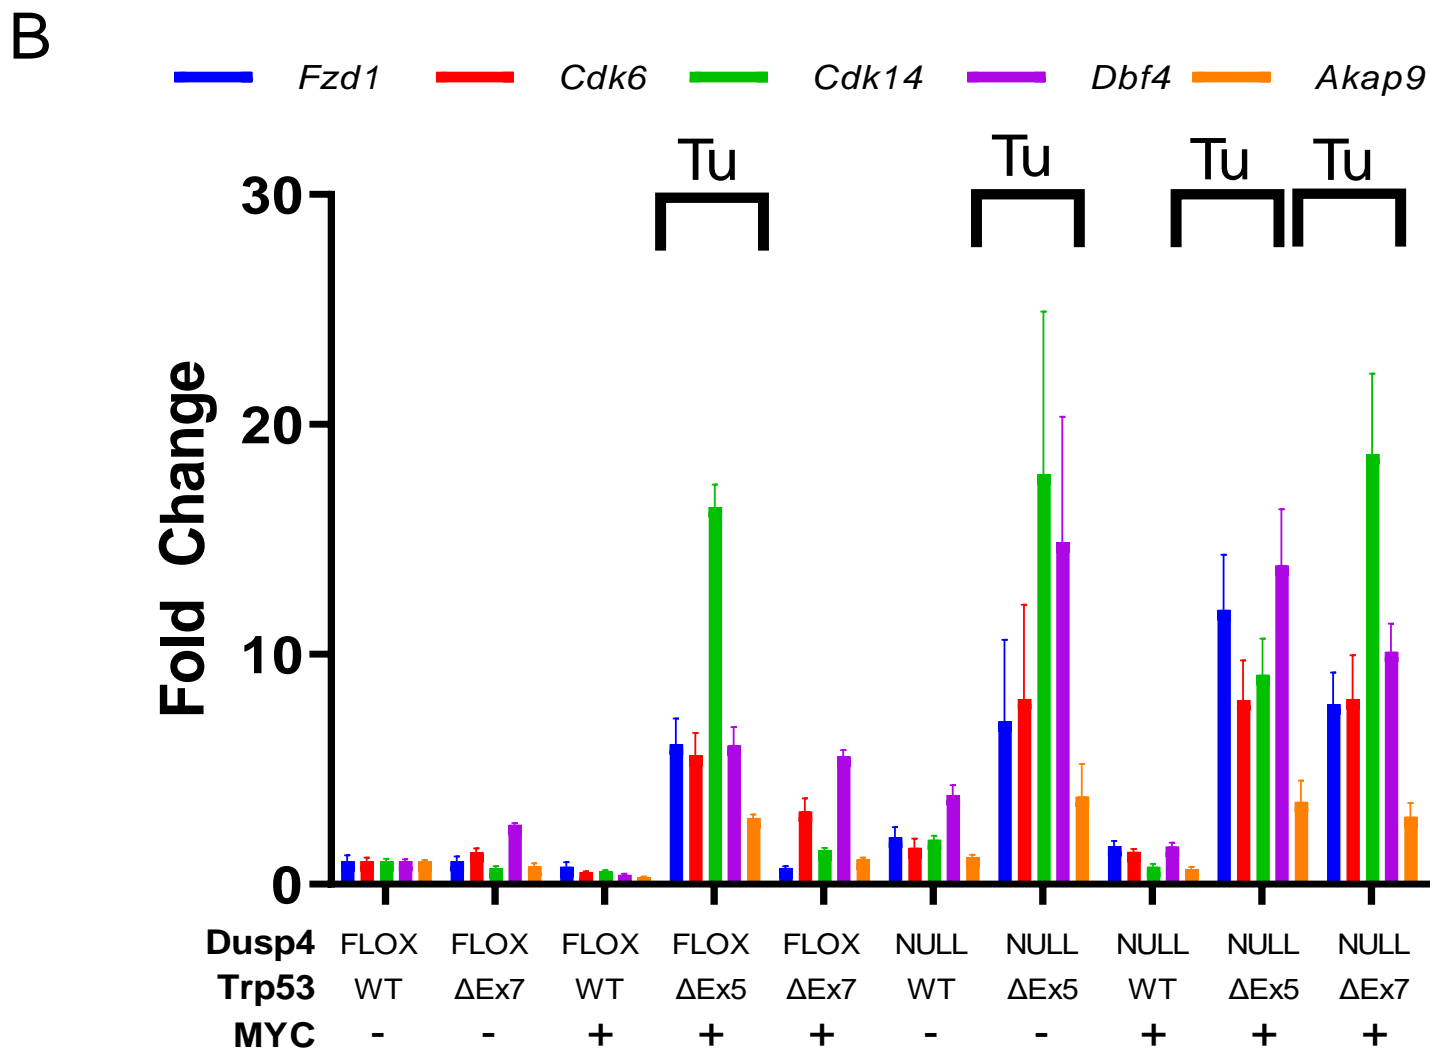

# Supplementary Figure 6

## A

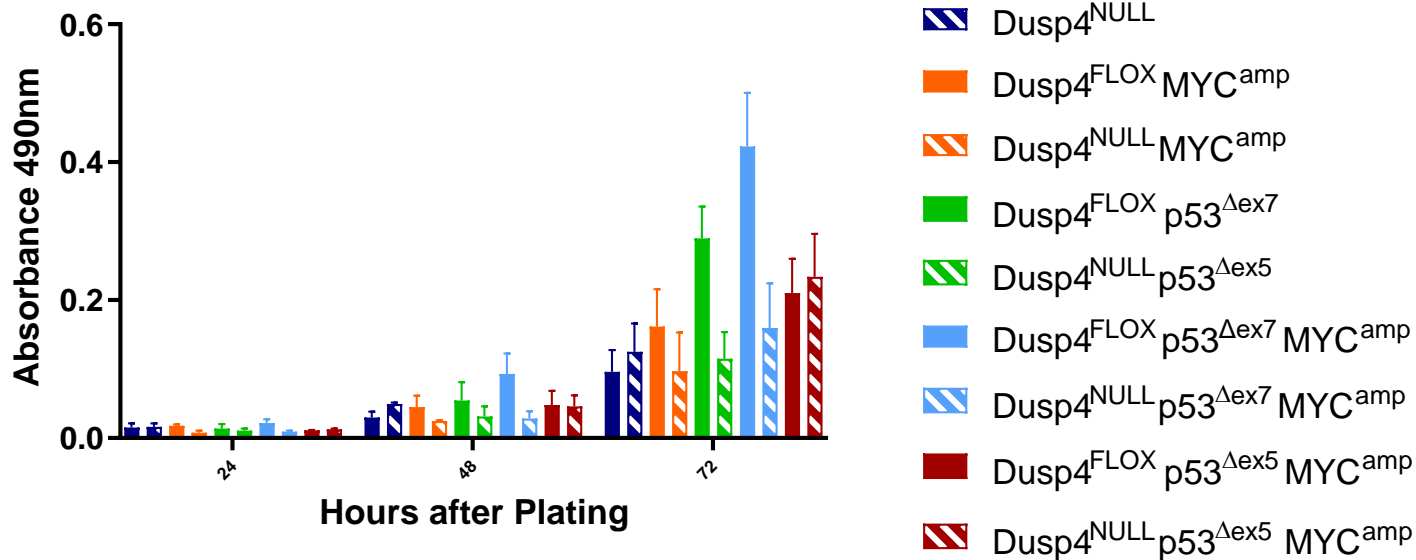

## B

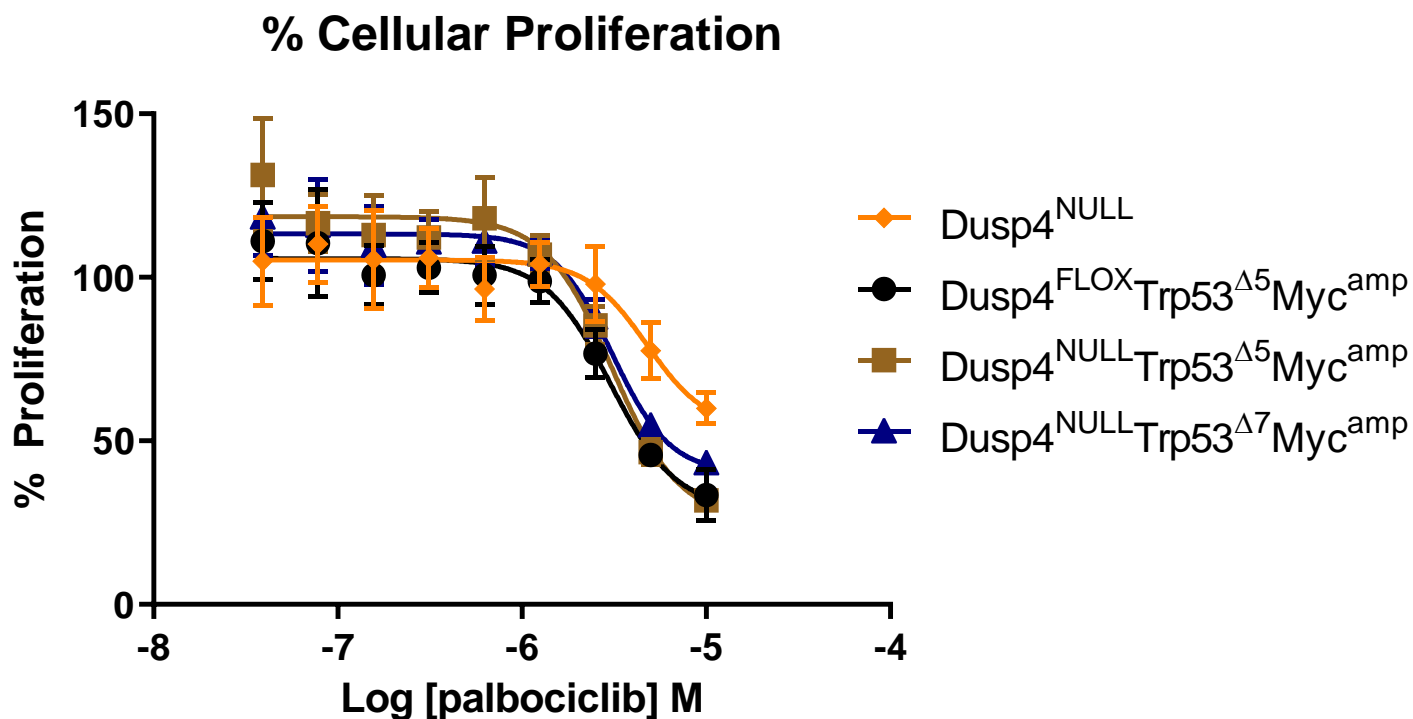

Supplement: 13058_2022_1542_MOESM1_ESM.pdf [file 13058_2022_1542_MOESM1_ESM.pdf]
